# Supplementary material
Source: PubMed Central journal article supplement (PMC4457473)
Supplement: mmc1.pdf [file mmc1.pdf]

**SUPPORTING MATERIAL**

**MOLECULAR DYNAMICS ANALYSIS OF ANTIBODY RECOGNITION  
AND ESCAPE BY HUMAN H1N1 INFLUENZA HEMAGGLUTININ**

Pek Jeong<sup>1</sup>, Rommie E. Amaro<sup>1\*</sup>, Wilfred W. Li<sup>2\*</sup>

Department of Chemistry and Biochemistry<sup>1</sup>

San Diego Supercomputer Center<sup>2</sup>

University of California, San Diego

La Jolla, CA 92093

\*Corresponding Author Contact Info

Wilfred Li, Phone: 858 822 0974, Email: [wilfred@ucsd.edu](mailto:wilfred@ucsd.edu)

Rommie Amaro, Phone: 858 534 9629, Email: [ramaro@ucsd.edu](mailto:ramaro@ucsd.edu)

Keywords: Salt Bridges, Free Energy Decomposition, Antibody-antigen Interaction, Immune  
Escape Mutations

| Naming Scheme | Crystal Structure | Strain                   | Simulation Time (ns) | No. of atoms |
|---------------|-------------------|--------------------------|----------------------|--------------|
| 18HA          | 3LZF              | A/South Carolina/1/1918  | 69                   | 475,554      |
| 09HA          | 3LZG              | A/California/04/2009     | 69                   | 539,569      |
| 06HA          | 3SM5              | A/Solomon Islands/3/2006 | 69                   | 467,368      |
| 09HA_mut      | 3LZG*             | A/California/mutant*     | 69                   | 565,969      |

**Supporting Table S1: Description of each system.** The four systems that were simulated in this experiment are shown above. Their system name, PDB ID, strain, simulation time and number of atoms are listed.

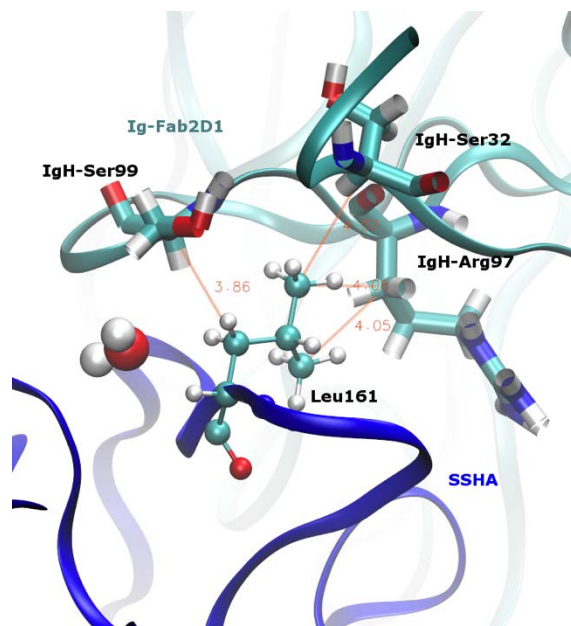

**Figure S1. VDW interaction between L161 and R97 of IgH.** Ig-2D1 residues are drawn in bonds style and L161 from 06HA is shown in CPK style using VMD. The rest of the Ig-2D1 and 06HA protein backbone are both displayed in ribbon. The 06HA is colored in navy blue and Ig-2D1 is in cyan.

|         |        |                        |
|---------|--------|------------------------|
| S (125) | Hbond  | IgL-W91 <sup>+</sup>   |
|         |        | IgL-D93 <sup>+</sup>   |
|         | Dipole | IgL-N95A <sup>+</sup>  |
|         |        | IgL-G95B <sup>+</sup>  |
| S (126) | Hbond  | IgL-D93 <sup>+</sup>   |
|         | Dipole | IgL-W91                |
| P (128) | VDW    | IgL-W91 <sup>+</sup>   |
| K (158) | Salt   | IgH-D54 <sup>+</sup>   |
|         | Hbond  | IgH-R97                |
|         | Dipole | IgH-D54 <sup>+</sup>   |
|         |        | IgH-T56 <sup>+</sup>   |
|         |        | IgH-R97                |
|         | VDW    | IgH-D54 <sup>+</sup>   |
| G (159) | Dipole | IgH-D53 <sup>+</sup>   |
|         |        | IgH-R97                |
| S (160) | Hbond  | IgH-D53                |
|         |        | IgH-D53                |
|         | Dipole | IgH-R97                |
|         |        | IgH-S99 <sup>+</sup>   |
| S (161) | Dipole | IgH-G33                |
|         |        | IgH-R97 <sup>+</sup>   |
|         |        | IgH-S99 <sup>+</sup>   |
| Y (162) | Hbond  | IgH-G100 <sup>+</sup>  |
|         | Dipole | IgH-V98                |
|         |        | IgH-S99 <sup>+</sup>   |
| P (163) | Dipole | IgH-D100A <sup>+</sup> |
|         | VDW    | IgH-R97 <sup>+</sup>   |
| K (164) | Hbond  | IgH-D100A              |
|         | VDW    | IgH-Y100B <sup>+</sup> |
| K (167) | Salt   | IgL-D93 <sup>+</sup>   |
|         | Hbond  | IgL-N31 <sup>+</sup>   |
|         | Dipole | IgL-S30 <sup>+</sup>   |
|         |        | IgL-N31 <sup>+</sup>   |
| S (168) | Hbond  | IgL-S30 <sup>+</sup>   |
|         | Dipole | IgL-S30 <sup>+</sup>   |
| Q (197) | Hbond  | IgH- S99               |
| N (198) | Dipole | IgH- S99 <sup>+</sup>  |
|         |        | IgH- G100 <sup>+</sup> |
| T (249) | Dipole | IgH- G100 <sup>+</sup> |
|         |        | IgH- G100              |

**Supporting Table S2. Bond interactions between Ig-2D1 and 18HA.** All the epitope residues (column I) and the corresponding Ig-2D1 residues (column III) are indicated according to the type of interactions (column II). The interactions that were also found in the crystal structure (PDB ID 3LZF) are marked with <sup>+</sup> next to Ig residues.

|         |        |                                       |
|---------|--------|---------------------------------------|
| S (125) | Hbond  | IgL-W91                               |
| S (126) | Hbond  | IgL-D93                               |
| P (128) | Dipole | IgL-W91                               |
|         | VDW    | IgL-W91                               |
|         | Dipole | IgH-R97                               |
| G (159) | VDW    | IgH-D54                               |
|         | Dipole | IgH-R97                               |
|         |        | IgH-D53                               |
| S (161) | Dipole | IgH-R97                               |
| Y (162) | Hbond  | IgH-G100                              |
| P (163) | Dipole | IgH-G100                              |
|         |        | IgH-D100A                             |
|         | VDW    | IgH-R97                               |
| K (164) | Hbond  | IgH-D100A                             |
|         | Dipole | IgH-W100B or IgH-D100A<br>or IgH-G100 |
|         | VDW    | IgH-D100A<br>IgH-W100B                |
| K (167) | Salt   | IgL-D93                               |
|         | Hbond  | IgL-N31                               |
|         | Dipole | IgL-S30                               |
| S (168) | Hbond  | IgL-S30                               |
|         | Dipole | IgL-S30                               |
| T (249) | Dipole | IgL-G100                              |

**Supporting Table S3. Bond interactions between Ig-2D1 and 09HA.** All the epitope residues (column I) and the corresponding Ig-2D1 residues (column III) are indicated according to the type of interactions (column II).

|         |        |                       |
|---------|--------|-----------------------|
| E (124) | Hbond  | IgH-Y58               |
| S (125) | Hbond  | IgL-W91               |
|         | Dipole | IgH-Y58               |
| S (126) | Dipole | IgL-W91               |
| P (128) | VDW    | IgL-W91               |
| K (158) | Dipole | IgH-R97               |
| N (159) | Hbond  | IgH-R97               |
| L (161) | VDW    | IgH-R97               |
| Y (162) | Dipole | IgH-G100              |
| P (163) | Dipole | IgH-D100A             |
|         | VDW    | IgH-V100C             |
| N (164) | Hbond  | IgH-D100A             |
|         | Dipole | IgH-V100C             |
|         |        | IgH-G100 or IgH-D100A |
| L (165) | VDW    | IgH-Y100B             |
| S (166) | Dipole | IgL-T32               |
| K (167) | Salt   | IgL-D93               |
|         | Hbond  | IgL-N31               |
|         | Dipole | IgL-S30               |
| S (168) | Hbond  | IgL-S30               |
|         | Dipole | IgL-G29               |
|         |        | IgL-S30               |

**Supporting Table S4. Bond interactions between Ig-2D1 and 06HA.** All the epitope residues (column I) and the corresponding Ig-2D1 residues (column III) are indicated according to the type of interactions (column II).

|         |        |           |
|---------|--------|-----------|
| S (125) | Hbond  | IgL-W91   |
|         | Dipole | IgL-D93   |
|         |        | IgL-N95A  |
| P (128) | VDW    | IgL-W91   |
| K (158) | VDW    | IgH-D54   |
| G (159) | Dipole | IgH-D53   |
|         |        | IgL-S24   |
| S (161) | Dipole | IgL-G25   |
|         |        | IgH-S99   |
| Y (162) | Hbond  | IgH-S99   |
|         |        | IgH-G100  |
| P (163) | Dipole | IgH-G100  |
|         |        | IgH-D100A |
|         | VDW    | IgH-R97   |
| K (164) | Hbond  | IgH-D100A |
|         | VDW    | IgH-D100A |
|         |        | IgH-Y100B |
| S (168) | Dipole | IgL-S30   |
| N (198) | Dipole | IgH-S99   |
|         |        | IgH-G100  |

**Supporting Table S5. Bond interactions between Ig-2D1 and 09HA\_mut.** All the epitope residues (column I) and the corresponding Ig-2D1 residues (column III) are indicated according to the type of interactions (column II).

| PB                           | 18HA   |     | 09HA   |     | 06HA   |     | 09HA_mut |     |
|------------------------------|--------|-----|--------|-----|--------|-----|----------|-----|
| Contribution                 | Mean   | SE  | Mean   | SE  | Mean   | SE  | Mean     | SE  |
| $\Delta E_{\text{vdW}}$      | -117.7 | 1.1 | -112.2 | 1.1 | -106.4 | 1.1 | -112.2   | 0.8 |
| $\Delta E_{\text{elec}}$     | -434.9 | 4.5 | -521.6 | 4.9 | -428.5 | 5.0 | -305.3   | 5.7 |
| $\Delta E_{\text{PB}}$       | 490.4  | 4.6 | 577.2  | 5.0 | 479.6  | 5.0 | 451.0    | 5.4 |
| $\Delta E_{\text{cavity}}$   | -12.2  | 0.1 | -11.4  | 0.1 | -12.3  | 0.1 | -11.5    | 0.1 |
| $\Delta G_{\text{gas}}$      | -552.7 | 4.8 | -633.8 | 5.2 | -534.9 | 5.2 | -417.5   | 5.9 |
| $\Delta G_{\text{solv}}$     | 478.2  | 4.5 | 565.8  | 4.9 | 497.3  | 4.9 | 379.6    | 5.3 |
| $\Delta G_{\text{subtotal}}$ | -74.4  | 1.1 | -68.0  | 1.2 | -67.6  | 1.6 | -37.9    | 1.6 |

**Supporting Table S6. MM-PBSA energy breakdown of the four systems.** All energies are reported in kcal/mol, averages from three independent calculations over a period of 69 ns.  $\Delta E_{\text{vdW}}$  is the van Der Waal term and  $\Delta E_{\text{elec}}$  is the electrostatic energy.  $\Delta E_{\text{PB}}$  is the solvation energy estimated using the Poisson Boltzmann equation.  $\Delta E_{\text{cavity}}$  is a repulsive nonpolar de-solvation energy term.  $\Delta G_{\text{gas}}$  is the energy of the protein complex in vacuum and  $\Delta G_{\text{solv}}$  is the energy takes to add solvent to a system in vacuum.



| GB (igb2)                    | 18HA   |     | 09HA   |     | 06HA   |     | 09HA_mut |     |
|------------------------------|--------|-----|--------|-----|--------|-----|----------|-----|
| Contribution                 | Mean   | SE  | Mean   | SE  | Mean   | SE  | Mean     | SE  |
| $\Delta E_{\text{vdW}}$      | -117.7 | 1.1 | -112.2 | 1.1 | -106.4 | 1.1 | -112.2   | 0.8 |
| $\Delta E_{\text{elec}}$     | -434.9 | 4.5 | -521.6 | 4.9 | -428.5 | 5.0 | -306.1   | 5.7 |
| $\Delta E_{\text{GB}}$       | 493.5  | 4.2 | 585.8  | 4.7 | 486.2  | 4.9 | 393.2    | 5.3 |
| $\Delta E_{\text{cavity}}$   | -15.3  | 0.1 | -14.6  | 0.1 | -14.6  | 0.1 | -14.1    | 0.1 |
| $\Delta G_{\text{gas}}$      | -552.7 | 4.8 | -633.8 | 5.2 | -534.9 | 5.2 | -418.3   | 6.0 |
| $\Delta G_{\text{solv}}$     | 478.1  | 4.2 | 571.1  | 4.7 | 471.5  | 4.9 | 379.2    | 5.3 |
| $\Delta G_{\text{subtotal}}$ | -74.5  | 1.0 | -62.7  | 1.1 | -63.4  | 1.5 | -39.1    | 1.1 |

**Supporting Table S7. MM-GBSA energy breakdown of the four systems.** All energies are reported in kcal/mol, averages from three independent calculations over a period of 69 ns.  $\Delta E_{\text{vdW}}$  is the van Der Waal term and  $\Delta E_{\text{elec}}$  is the electrostatic energy.  $\Delta E_{\text{GB}}$  is the solvation energy estimated using the Generalized Born equation.  $\Delta E_{\text{cavity}}$  is a repulsive nonpolar de-solvation energy term.  $\Delta G_{\text{gas}}$  is the energy of the protein complex in vacuum and  $\Delta G_{\text{solv}}$  is the energy takes to add solvent to a system in vacuum.

| Position |   | 18HA     |   | 09HA     |   | 06HA     |   | 09_mut   |
|----------|---|----------|---|----------|---|----------|---|----------|
| 124      | T | -0.6±0.1 |   | -1.1±0.1 | E | 0.4±0.1  |   | -1.0±0.1 |
| 125      | S | -3.4±0.1 |   | -3.1±0.2 |   | -2.6±0.1 |   | -3.5±0.2 |
| 126      | S | -3.1±0.1 |   | -3.0±0.1 |   | -3.5±0.2 |   | -0.7±0.1 |
| 128      | P | -2.7±0.1 |   | -3.0±0.1 |   | -2.6±0.1 |   | -2.9±0.1 |
| 129      | N | 0.4±0.1  |   | -0.9±0.1 |   | -0.2±0.1 |   | -0.1±0.1 |
| 157      | K | 0.3±0.0  |   | 0.5±0.0  | G | 0.2±0.0  |   | 0.6±0.0  |
| 158      | K | -4.4±0.2 |   | -2.3±0.2 |   | -2.2±0.2 |   | -1.9±0.2 |
| 159      | G | -3.1±0.1 |   | -2.2±0.1 | N | -2.9±0.1 |   | -1.8±0.1 |
| 160      | S | -4.9±0.2 | N | -0.5±0.1 | G | -0.0±0.0 | N | -0.9±0.1 |
| 161      | S | -1.8±0.1 |   | -1.8±0.1 | L | -4.0±0.1 |   | -2.0±0.1 |
| 162      | Y | -2.3±0.1 |   | -2.3±0.1 |   | -0.7±0.1 |   | -2.6±0.1 |
| 163      | P | -4.5±0.1 |   | -4.7±0.1 |   | -3.3±0.1 |   | -4.7±0.1 |
| 164      | K | -3.9±0.1 |   | -3.8±0.1 | N | -2.7±0.1 |   | -3.3±0.1 |
| 165      | L | -0.6±0.1 |   | -0.9±0.1 |   | -1.4±0.1 |   | -0.4±0.0 |
| 166      | S | -0.6±0.1 |   | -0.6±0.1 |   | -1.0±0.1 |   | -0.6±0.1 |
| 167      | K | -6.6±0.2 |   | -6.3±0.2 |   | -6.6±0.2 | E | 2.9±0.1  |
| 168      | S | -1.7±0.1 |   | -1.1±0.1 |   | -2.3±0.1 |   | -0.4±0.1 |
| 170      | V | -1.3±0.1 | I | -1.5±0.1 | A | -0.7±0.0 | I | -1.3±0.1 |
| 197      | Q | -0.7±0.1 |   | -0.5±0.1 | H | 0.1±0.0  |   | -0.6±0.1 |
| 198      | N | -0.5±0.0 |   | -0.5±0.1 | T | -0.4±0.0 |   | -0.4±0.1 |
| 247      | E | 0.8±0.0  |   | 1.0±0.0  |   | 0.7±0.0  |   | 0.8±0.0  |
| 249      | T | -0.5±0.0 |   | -0.6±0.0 | N | -0.6±0.1 |   | -0.6±0.0 |

**Supporting Table S8. Energy decomposition breakdown of the four systems.** All energies are reported in kcal/mol +/- standard deviation of the mean. The values are obtained from averaging three monomers over 69 ns. All the canonical epitope residues and the surrounding residues are shown for the 18HA. For other systems, only the mutations are listed.
